# Supplementary material
Source: PubMed Central journal article supplement (PMC3069767)

**Supplemental Fig. 1.** WT C57Bl/6 mice were treated with clodronate- or PBS-containing liposomes and monitored for **(A)** blood glucose or **(B)** survival after EMCV-D infection (n=8, two independent experiments).

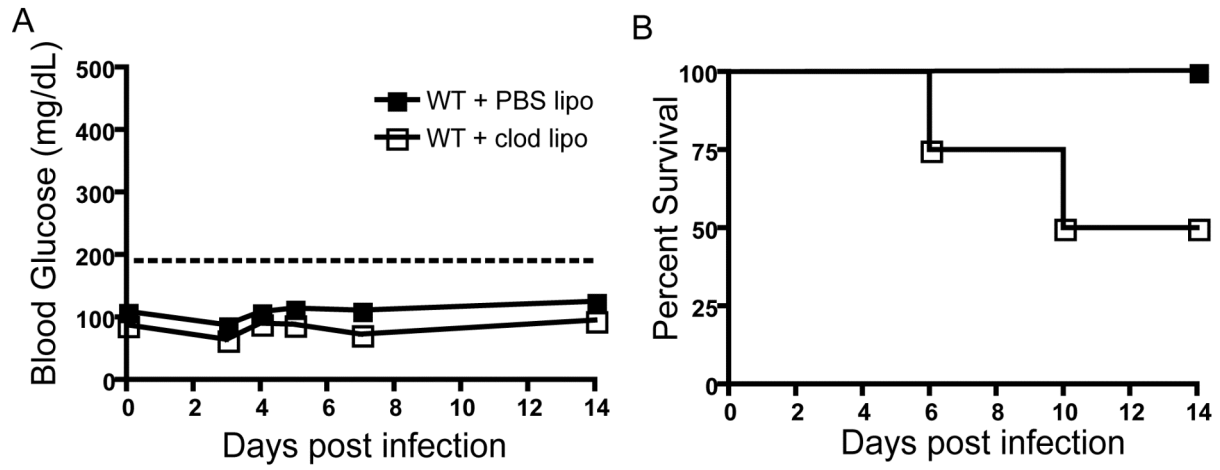

Supplement: JCI44005sd.pdf [file JCI44005sd.pdf]
